# Supplementary material for: Interaction of hydroperoxopalladium complexes, (TpR)(py)Pd–OOH, with hydroxo-nickel and -cobalt complexes, [(μ-OH)(MTpR′)]2(M = Ni, Co), leading to oxidative dehydrogenation of the saturated hydrocarbyl moiety in the ancillary ligand (TpiPr2)
Source: Royal Society of Chemistry journal article supplement (doi:10.1039/b307262m), 2003-01-01
Supplement: b307262m.pdf [file b307262m.pdf]

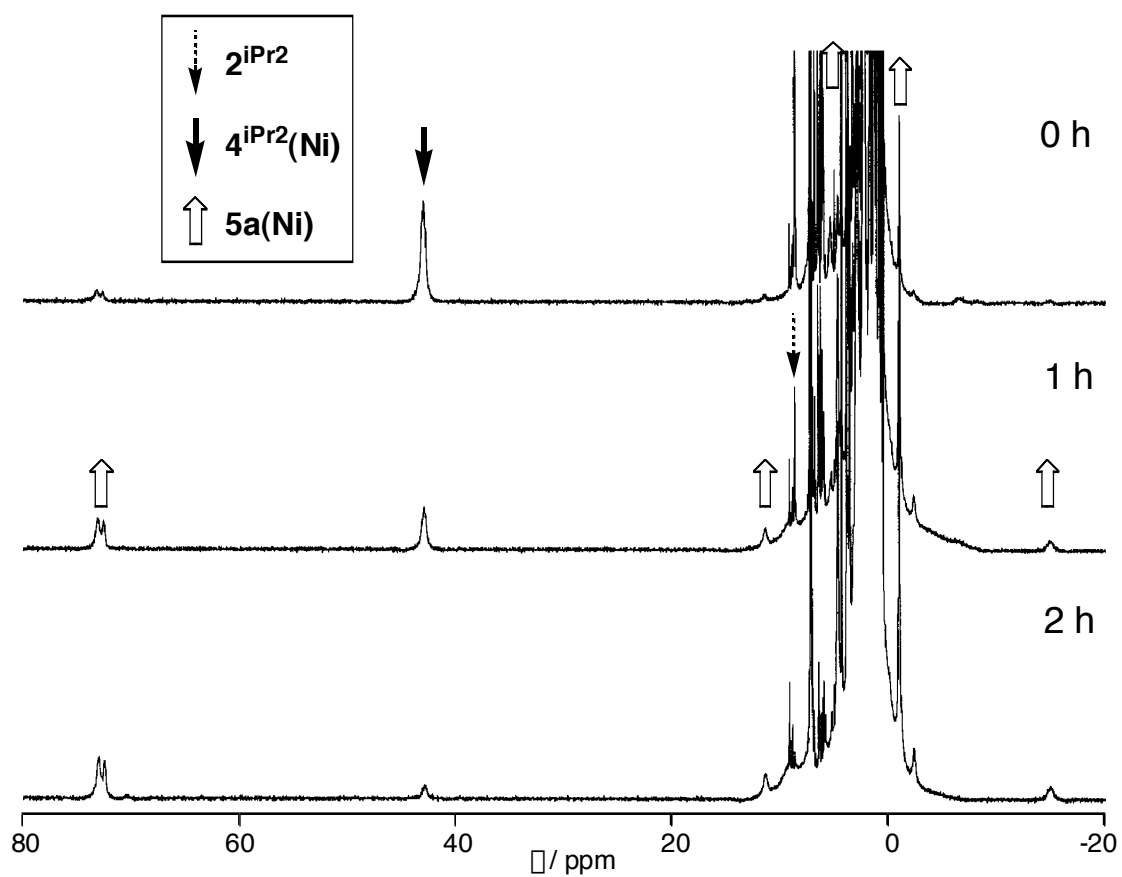

Figure 4.  $^1\text{H-NMR}$  spectral change of a mixture of  $2^{\text{iPr}_2}$  and  $4^{\text{iPr}_2(\text{Ni})}$  at  $-20^\circ\text{C}$ . observed at 400 MHz.
